# Supplementary material for: Establishment of the Bacterial Microbiota in A Lab-Reared Model Teleost Fish, the Medaka <em>Oryzias Latipes</em>
Source: Preprints.org preprint supplement (doi:10.20944/preprints202211.0231.v1), 2022-11-14
Supplement: Supplementary file 3 [file supplementary]

## Sheet: TableS1
	Table S1: samples and specimens used in this study with associated characteristics and accession numbers; Illumina 16SrRNA reads (raw, quality filtered, denoised and non-chimeric) and diversity indices: observed richness, Shannon index and evenness.
Accession	Sample Name	Days	Life stage	sex	Raw reads	filtered reads	denoised	non-chimeric	Richness	Shannon	Evenness
SAMN31227644	d14j2	d14 dpf	larvae	not determined	184738	7170	6978	6978	31	2.65035	0.771799
SAMN31227645	d14j3	d14 dpf	larvae	not determined	124488	2959	2816	2816	11	0.98159	0.409355
SAMN31227646	d14j4	d14 dpf	larvae	not determined	140529	3538	3339	3339	21	2.3093	0.758511
SAMN31227648	d14j7	d14 dpf	larvae	not determined	76425	3125	2980	2980	29	2.75842	0.819179
SAMN31227649	d14j8	d14 dpf	larvae	not determined	134866	6801	6560	6560	21	1.86326	0.612003
SAMN31227650	d30j1	d30	juvenile	not determined	102010	4575	4211	4211	46	2.60455	0.680279
SAMN31227651	d30j2	d30	juvenile	not determined	130591	3111	2732	2732	40	3.03995	0.824086
SAMN31227652	d30j3	d30	juvenile	not determined	125471	5801	5501	5501	37	2.44307	0.676578
SAMN31227653	d30j4	d30	juvenile	not determined	54423	6134	5756	5756	37	2.51417	0.696268
SAMN31227654	d30j5	d30	juvenile	not determined	75015	2352	2016	2016	30	2.87376	0.844926
SAMN31227655	d90f1	d90	adult	female	88952	28481	28099	27667	41	1.97349	0.531427
SAMN31227656	d90f2	d90	adult	female	73765	28063	27803	27452	25	1.63312	0.507356
SAMN31227657	d90f4	d90	adult	female	93878	31366	31069	30459	33	1.85474	0.530456
SAMN31227658	d90f7	d90	adult	female	80330	5606	5472	5472	22	1.94855	0.630385
SAMN31227659	d90f9	d90	adult	female	79025	20536	20099	19926	51	2.47655	0.629872
SAMN31227660	d90m1	d90	adult	male	66942	21030	20590	20297	37	1.74375	0.482909
SAMN31227661	d90m3	d90	adult	male	82362	30803	30514	30155	24	1.61571	0.508396
SAMN31227662	d90m6	d90	adult	male	81111	29300	28929	28578	32	1.78258	0.514344
SAMN31227663	d90m8	d90	adult	male	70242	26382	26055	25689	32	1.77536	0.512261
SAMN31227664	d120f1	d120	adult	female	57252	17129	16576	16576	41	2.366	0.637123
SAMN31227665	d120f2	d120	adult	female	78668	18820	18062	18062	59	2.46038	0.603398
SAMN31227666	d120f4	d120	adult	female	80982	25175	24561	24486	52	2.47062	0.625276
SAMN31227667	d120f5	d120	adult	female	83510	28280	27799	27524	30	2.10378	0.618541
SAMN31227668	d120f6	d120	adult	female	74897	20497	19854	19526	59	2.63261	0.645637
SAMN31227669	d120f8	d120	adult	female	60321	19016	18505	18505	34	2.12648	0.603024
SAMN31227670	d120f9	d120	adult	female	210669	19666	19102	19004	44	2.40306	0.635027
SAMN31227671	d120m1	d120	adult	male	60513	17548	17057	16935	40	2.45647	0.665913
SAMN31227672	d120m2	d120	adult	male	59412	14957	14471	14277	54	2.61268	0.654973
SAMN31227673	d120m3	d120	adult	male	77681	2993	2451	2398	36	3.02004	0.842757
SAMN31227674	d120m4	d120	adult	male	64389	22755	22323	22130	31	1.88267	0.548245
SAMN31227675	d120m5	d120	adult	male	59087	20197	19608	19458	45	2.33181	0.612559
SAMN31227676	d120m6	d120	adult	male	60917	18249	17773	17651	48	2.45927	0.635274
SAMN31227677	d120m7	d120	adult	male	54828	13300	12777	12777	55	2.62165	0.654213
SAMN31227680	d14water	d14	water		323645	66487	64357	63138	129	2.82717	0.581744
SAMN31227681	d30water	d30	water		90513	28254	27067	27067	113	2.45054	0.518371
SAMN31227682	d90water	d90	water		64023	20939	19851	19851	119	2.85296	0.596964
SAMN31227683	d120water	d120	water		56067	4886	4018	4018	65	3.22847	0.7734

## Sheet: TableS2
Table S2: average values and standard deviations of richness, Shannon index and evenness for the different life stages and sample categories.
	Richnness
	d14	d30	d90_female	d90_male	d120_female	d120-male	water
number of samples	5	5	5	4	7	7	4
average	22.6	38	34.4	31.25	45.5714	44.1429	106.5
standard deviation	7.92465	5.78792	11.8659	5.37742	11.5594	9.00793	28.4429
	Shannon
	d14	d30	d90_female	d90_male	d120_female	d120-male	water
number of samples	5	5	5	4	7	7	4
average	2.11258	2.6951	1.97729	1.72935	2.36613	2.48351	2.83979
standard deviation	0.722201	0.252637	0.309666	0.0776143	0.190804	0.0902217	0.317762
	Evenness
	d14	d30	d90_female	d90_male	d120_female	d120-male	water
number of samples	5	5	5	4	7	7	4
average	0.674169	0.674169	0.565899	0.504477	0.624004	0.659134	0.61762
standard deviation	0.167081	0.167081	0.0594196	0.0145883	0.0166224	0.0902217	0.109288

## Sheet: TableS3
Table S3: results of PERMANOVA and BETADISP tests performed on fish age categories (d14, d30, d90 and d120) based on unweighted and weighted UniFrac distances.
PERMANOVA: Unweighted UniFrac distances										BETADISP test : Unweighted UniFrac distances
		Df	SumsOfSqs	F.Model	R2	p.value	p.adjusted	sig			Df	Sum.Sq	Mean.Sq	F.value	Pr..F.
	D_014 vs D_030	1	1.191604	6.856724	0.4615233	0.007	0.042	.		Groups	3	0.04433311	0.014777704	2.650772	0.06742732
	D_014 vs D_090	1	1.316053	10.865648	0.4751953	0.002	0.012	.		Residual	29	0.16167117	0.005574868	NA	NA
	D_014 vs D_120	1	1.633962	12.605912	0.4257904	0.001	0.006	*
	D_030 vs D_090	1	1.099068	9.487120	0.4415259	0.001	0.006	*
	D_030 vs D_120	1	1.101541	8.749526	0.3397937	0.001	0.006	*
	D_090 vs D_120	1	1.001229	9.542396	0.3124311	0.001	0.006	*
PERMANOVA: Weighted UniFrac distances										BETADISP test : Weighted UniFrac distances
		Df	SumsOfSqs	F.Model	R2	p.value	p.adjusted	sig			Df	Sum.Sq	Mean.Sq	F.value	Pr..F.
	D_014 vs D_030	1	0.4301629	10.242777	0.5614703	0.007	0.042	.		Groups	3	0.06545256	0.021817520	3.09481	0.04227475
	D_014 vs D_090	1	1.1713844	52.078685	0.8127302	0.002	0.012	.		Residual	29	0.20444166	0.007049713	NA	NA
	D_014 vs D_120	1	1.1863533	26.871480	0.6125045	0.001	0.006	*
	D_030 vs D_090	1	1.1630056	59.599721	0.8324016	0.001	0.006	*
	D_030 vs D_120	1	1.0653620	25.337799	0.5984676	0.001	0.006	*
	D_090 vs D_120	1	0.2378009	7.697893	0.2682390	0.001	0.006	*

## Sheet: TableS4
Table S4: Main bacterial genera identified from samples at each day of sampling, with median percentage and standard deviation (NA: not available, only one sample).
	Fish												Water
	d_014			d_030			d_090			d_120			d_014		d_030		d_090		d_120
Genus	Sample type	Median	SD	Sample type	Median	SD	Sample type	Median	SD	Sample type	Median	SD	Median	SD	Median	SD	Median	SD	Median	SD	Genus
Aeromonas	larvae	1.72744721689059	18.7373986151019	juvenile	4.6862896979086	4.38695180498264	gut	10.9978754481477	8.04148607421699	gut	8.67631967651247	7.58706914271256	0.250503384966626	NA	0.43997485857951	NA	0.96959903040097	NA	0	NA	Aeromonas
Cetobacterium	larvae	0	0	juvenile	0	2.79723611000659	gut	75.5319896060117	12.6020878283774	gut	52.5753883172654	19.4836282938246	2.05317647804924	NA	1.53436610344955	NA	1.49479850520149	NA	2.79702335129587	NA	Cetobacterium
Hyphomicrobium	larvae	0	0	juvenile	27.1180237877402	5.39712271007699	gut	0.179771768016258	0.108623914724399	gut	0.349211792713013	0.273349442095126	1.73132719230098	NA	1.23858468591711	NA	0.636299363700636	NA	2.07852193995381	NA	Hyphomicrobium
Legionella	larvae	0	5.45382433536534	juvenile	17.4016468435499	14.7152978530839	gut	0.557694861240207	2.49634293576915	gut	0.119741056633679	0.284533821417253	0.405878902224407	NA	0.576773764188265	NA	2.31794768205232	NA	0	NA	Legionella
Leptospira	larvae	0.426829268292683	0.708207754610475	juvenile	0	0	gut	0	0	gut	0	0	71.7153140012367	NA	65.8853107553518	NA	0	NA	0.307929176289453	NA	Leptospira
Nocardia	larvae	0	0	juvenile	0	0	gut	0.497054491899853	0.393931323809417	gut	5.28200397813326	9.94385492012154	0	NA	0	NA	3.11079688920311	NA	8.33974852450603	NA	Nocardia
Perlucidibaca	larvae	8.62804878048781	12.2219281721897	juvenile	0	0	gut	0	0	gut	0	0	1.20019659759326	NA	2.5363256553407	NA	0	NA	0	NA	Perlucidibaca
Pseudomonas	larvae	7.70010131712259	36.1488191104149	juvenile	0	1.06328883102369	gut	0.771863394742591	1.88138394845437	gut	0.123463319997751	0.517339017278198	0.0206110380035831	NA	0.114615299293822	NA	1.01504898495102	NA	0.384911470361817	NA	Pseudomonas
Shewanella	larvae	0	0	juvenile	0	0	gut	3.9371513980533	1.23455461707654	gut	7.13220903487282	3.10985946407825	0	NA	0.081339889821422	NA	0	NA	0	NA	Shewanella
ZOR0006	larvae	0	0	juvenile	0	0.59983939783899	gut	2.44666132673123	1.52717097883015	gut	8.98801672054117	6.0352453494594	0.0301238247744677	NA	0.0517617480681776	NA	0.0959499040500959	NA	0	NA	ZOR0006
